# Supplementary material for: De novo whole-genome assembly in an interspecific hybrid table grape, ‘Shine Muscat’
Source: PubMed Central journal article supplement (PMC9724765; doi:10.1093/dnares/dsac040), 2022-11-07

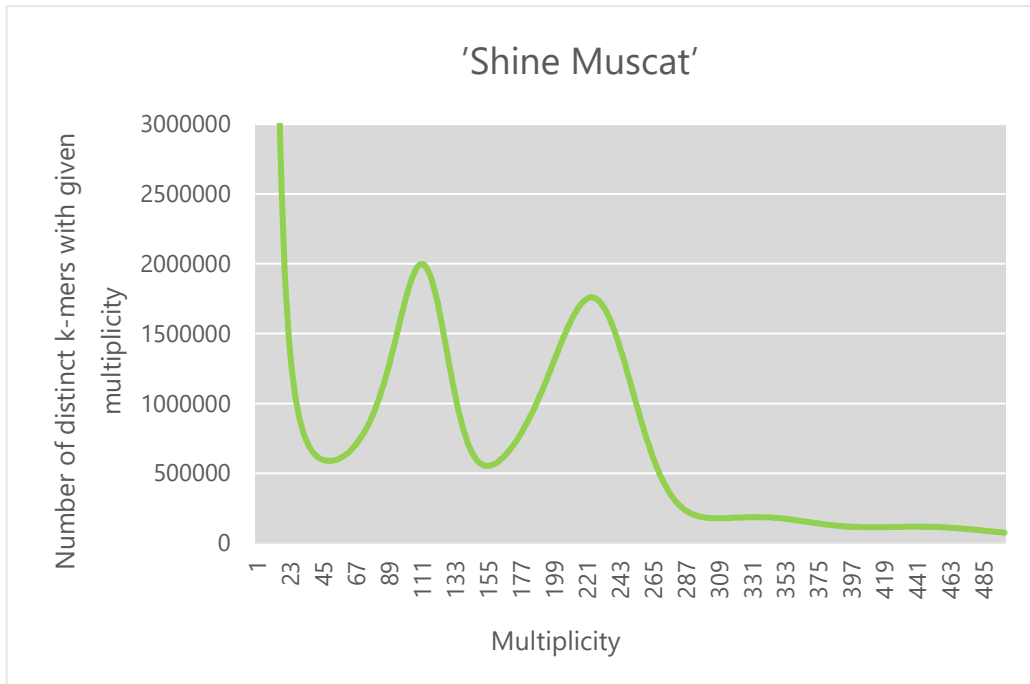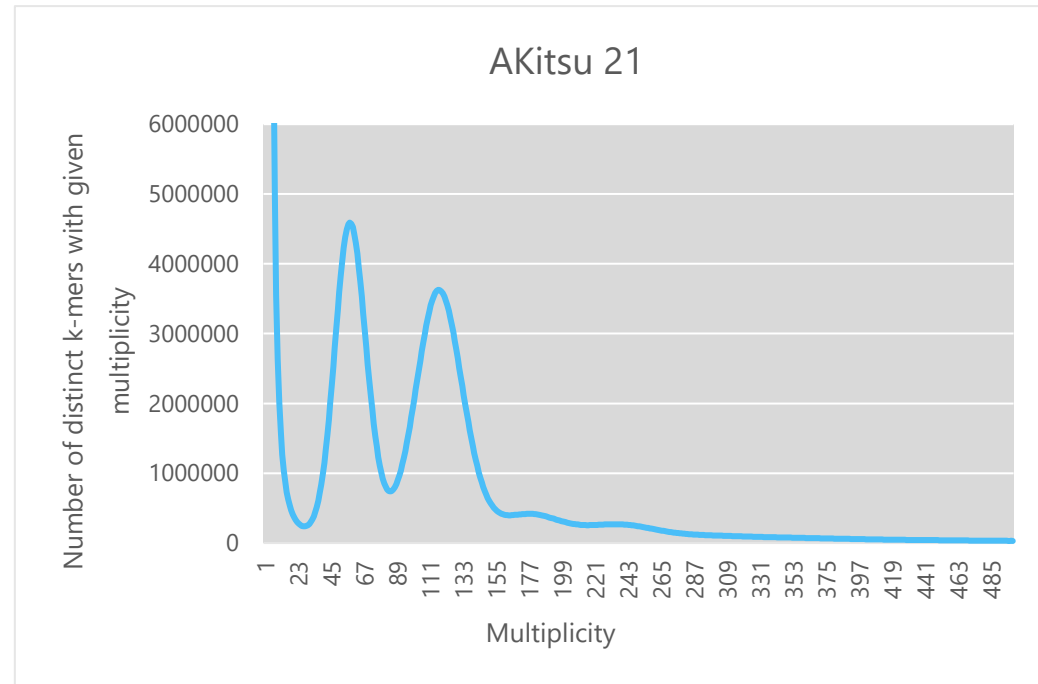

|              | Peak | Estimated Coverage: | Estimated Genome Size: |
|--------------|------|---------------------|------------------------|
| Shine_Muscat | 111  | 119.8               | 999,223,129.4          |
|              | 225  | 242.8               | 492,950,077.2          |
| Akitsu21     | 58   | 64.9                | 1,112,728,631.9        |
|              | 117  | 130.9               | 551,609,065.4          |
| Hakunan      | 39   | 43.6                | 1,116,387,055.0        |
|              | 79   | 88.4                | 551,127,786.8          |

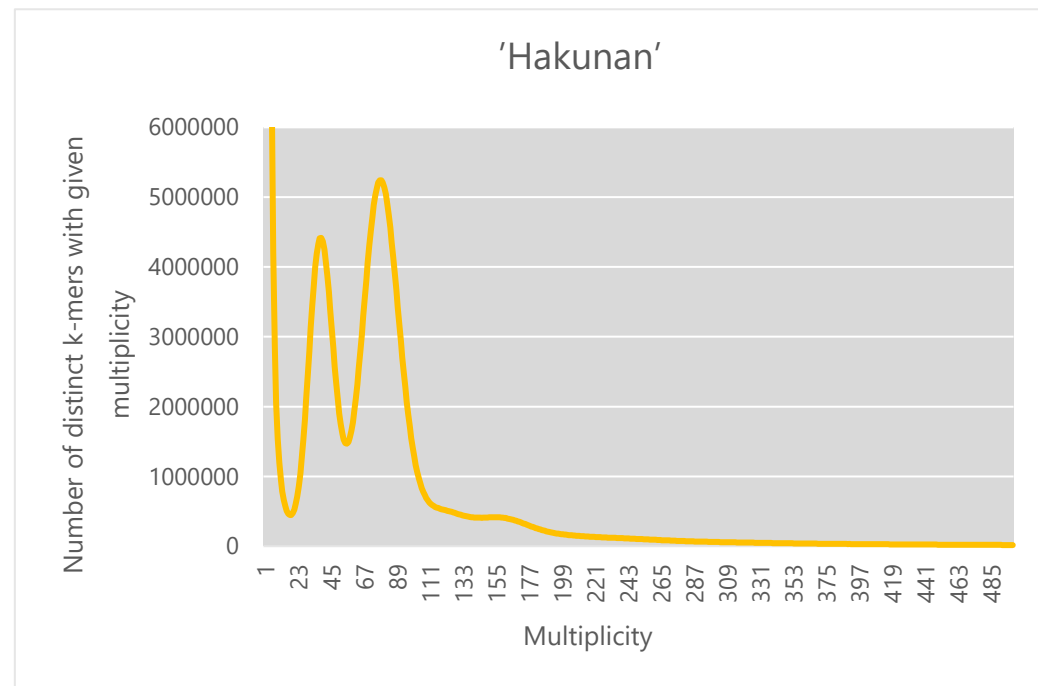

**Supplementary Fig. S1.** Genome size estimation using Jellyfish with the distribution of the number of distinct kmers (kmer = 17) with the given multiplicity values.

### 'Shine Muscat'

### AKitsu 21

### 'Hakunan'

#### GenomeScope Profile

len:374,085,271bp uniq:51.1% het:1.79% kcov:112 err:0.499% dup:4.25% k:17

#### GenomeScope Profile

len:447,230,329bp uniq:43.5% het:1.85% kcov:59.4 err:0.295% dup:1.1% k:17

#### GenomeScope Profile

len:455,057,695bp uniq:43.6% het:1.32% kcov:39.9 err:0.301% dup:0.865% k:17

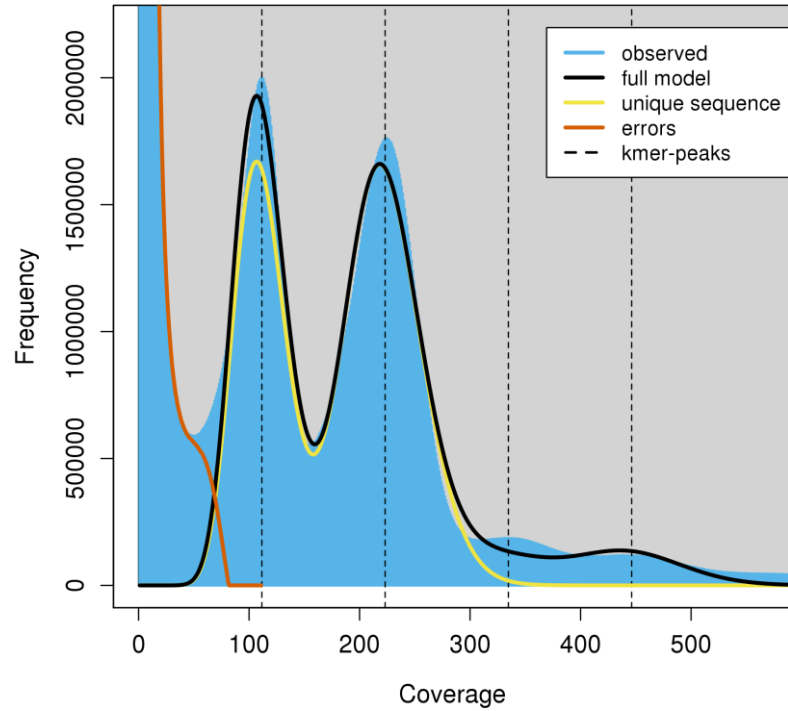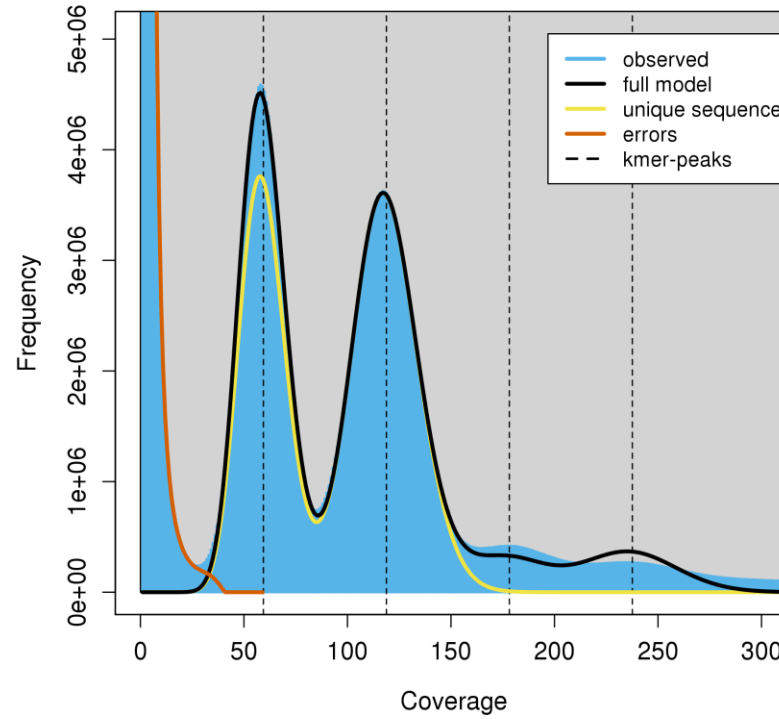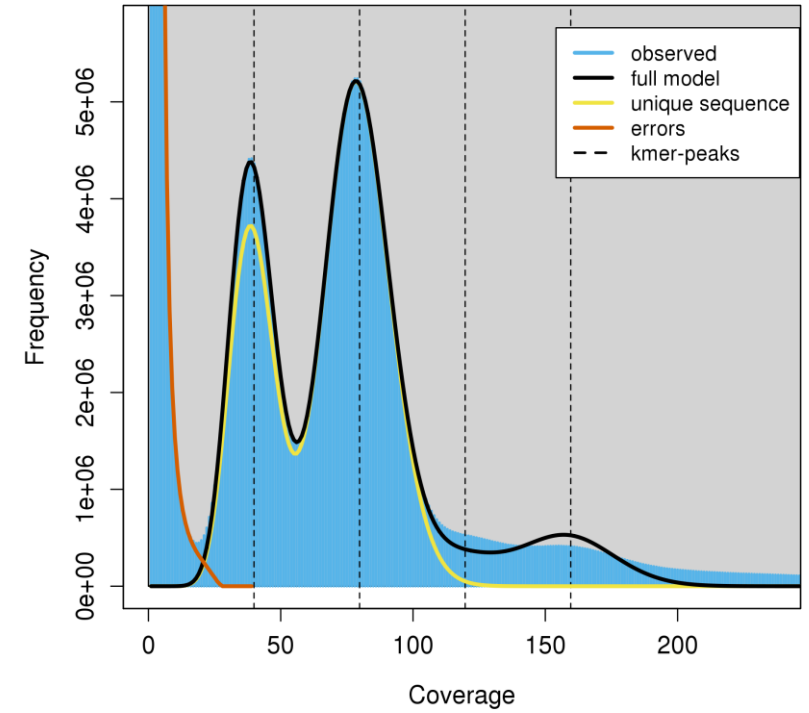

**Supplementary Fig. S2.** Genome size and heterozygosity estimation using Genomescope 1.0 with the distribution of the number of distinct kmers (kmer = 17) with the given multiplicity values.

### Supplementary Fig. S3.

Comparisons of variant positions mapped on the longest 19 Hi-C scaffolds and the integrated linkage map.

The names under the heading 'PGA\_scaffold' represents the names of the 19 Hi-C scaffolds. The chromosome numbers given later on the analysis were shown with blue letters.

# A) Comparison with the integrated linkage map

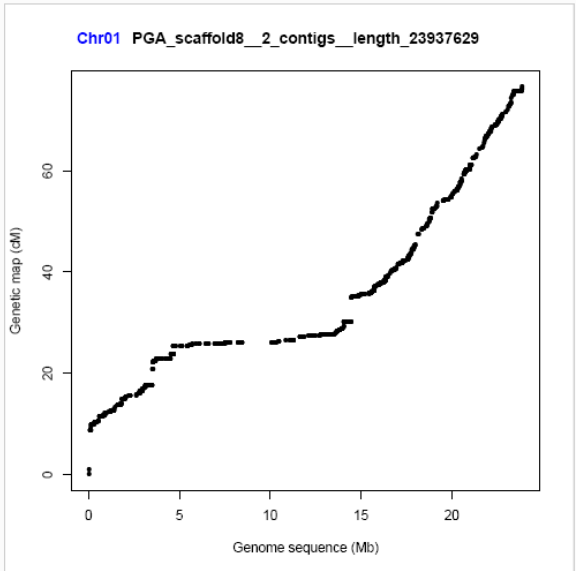

1

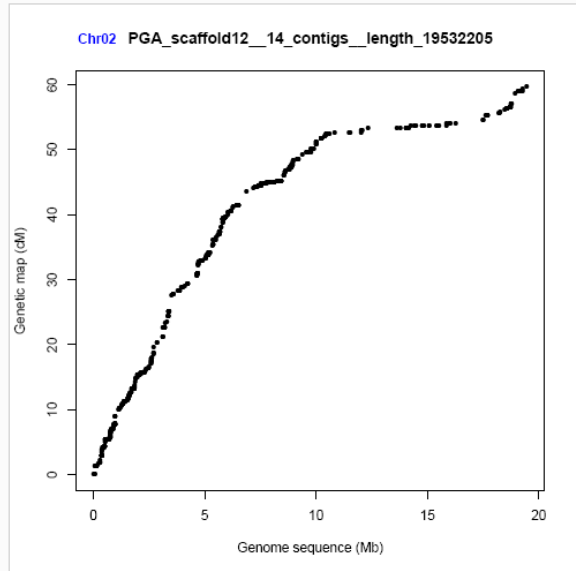

2

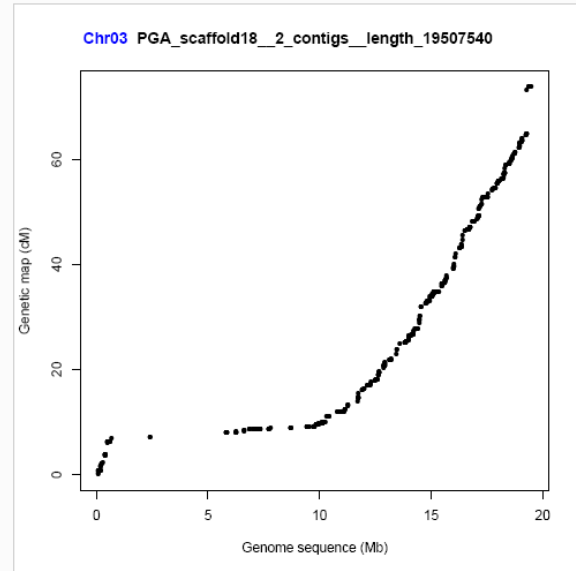

3

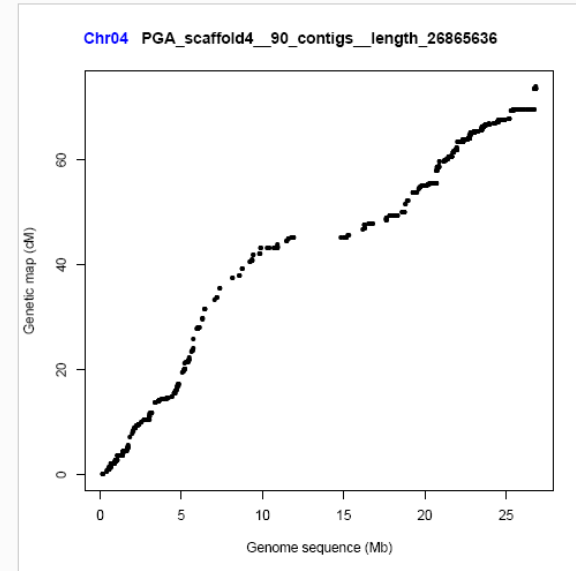

4

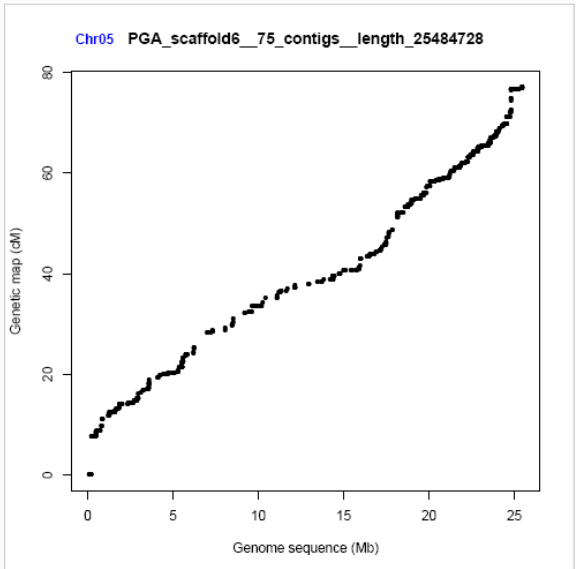

5

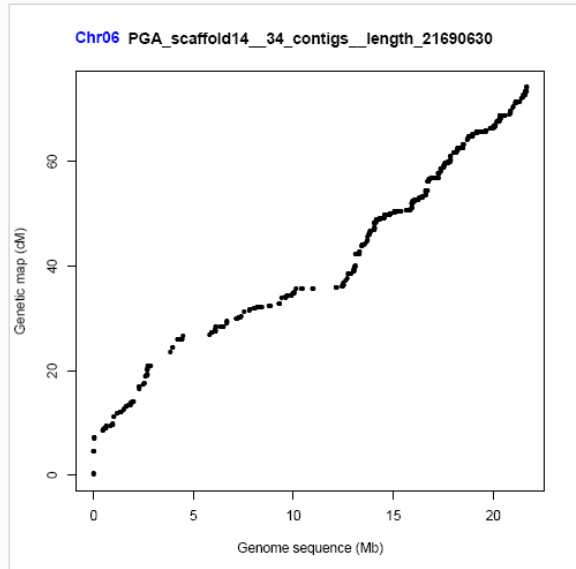

6

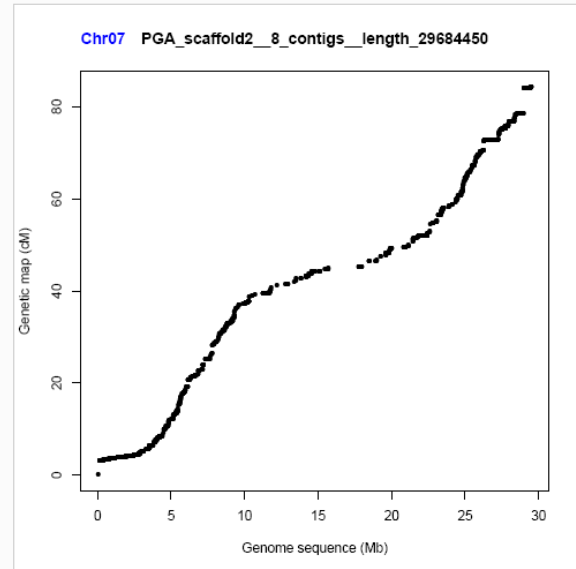

7

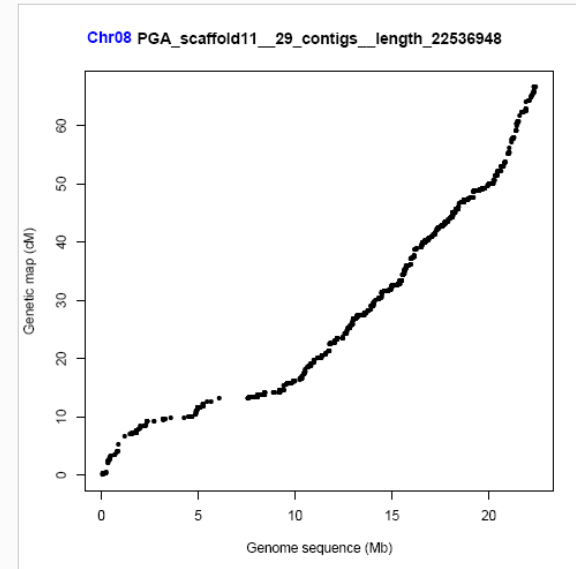

8

Chr09 PGA\_scaffold9\_80\_contigs\_length\_23488122

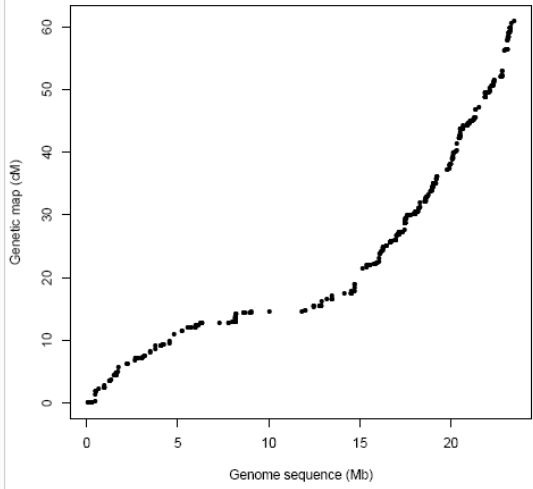

9

Chr10 PGA\_scaffold7\_6\_contigs\_length\_24671681

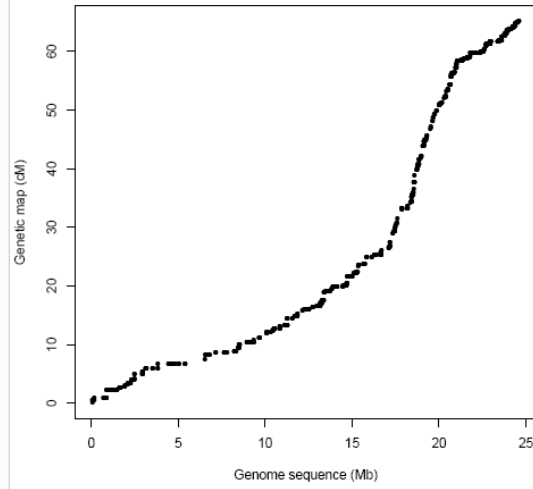

10

Chr11 PGA\_scaffold16\_8\_contigs\_length\_19281646

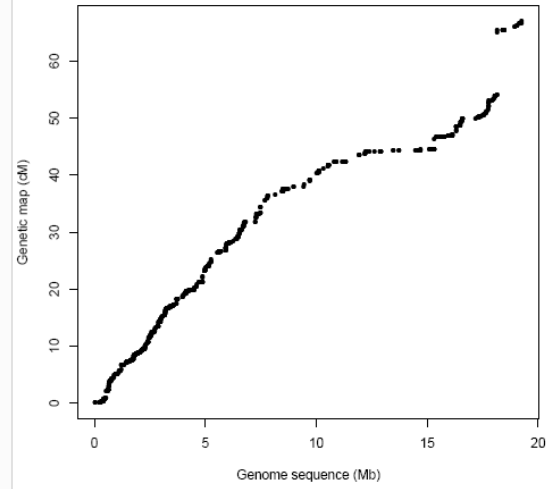

11

Chr12 PGA\_scaffold10\_3\_contigs\_length\_22859447

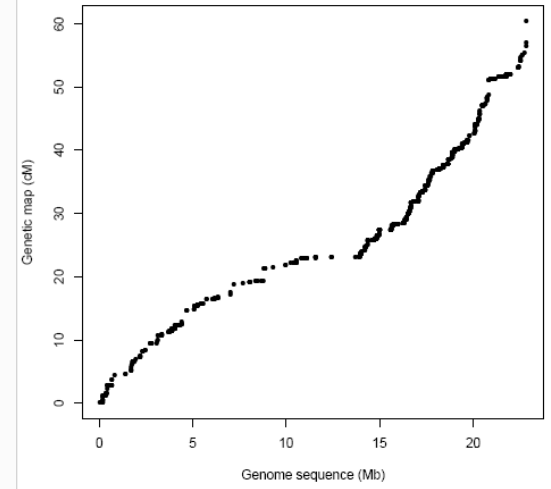

12

Chr13 PGA\_scaffold0\_5\_contigs\_length\_32036281

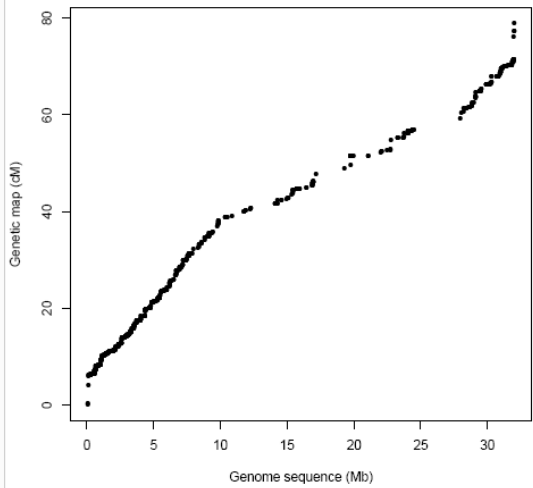

13

Chr14 PGA\_scaffold3\_5\_contigs\_length\_29504403

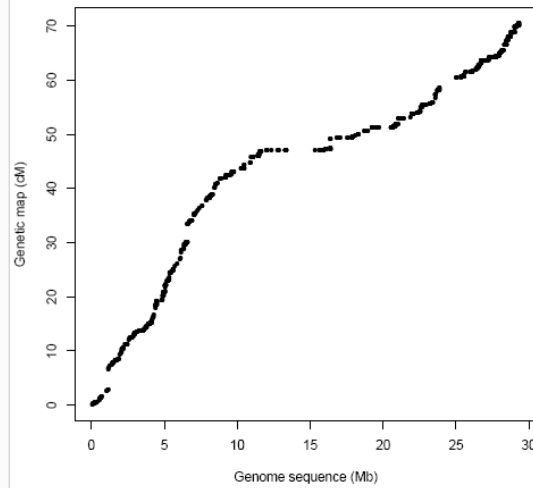

14

Chr15 PGA\_scaffold15\_11\_contigs\_length\_21074376

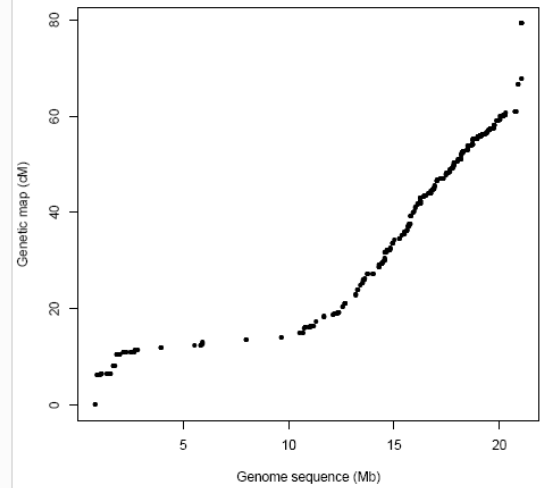

15

Chr16 PGA\_scaffold17\_11\_contigs\_length\_20575746

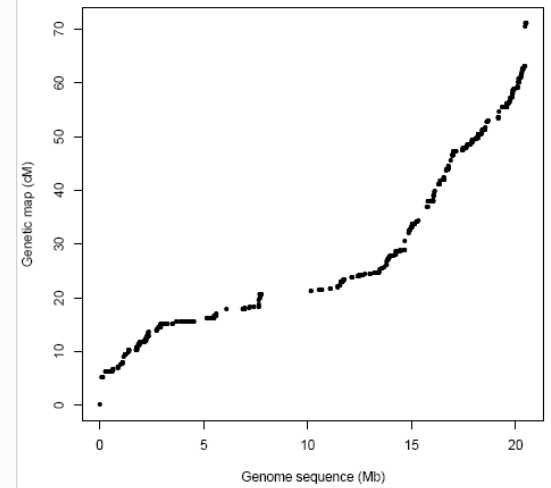

16

Chr17 PGA\_scaffold13\_5\_contigs\_length\_20111917

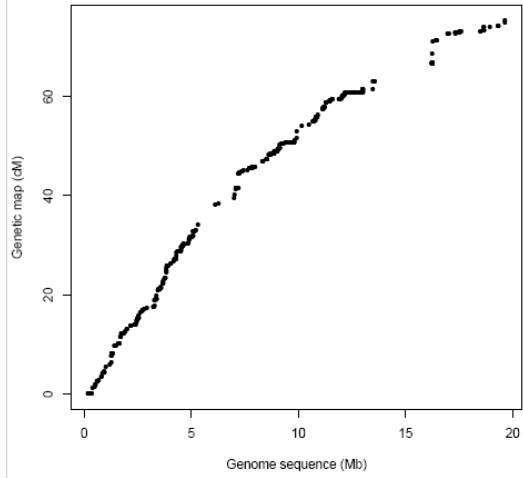

17

Chr18 PGA\_scaffold1\_41\_contigs\_length\_35651461

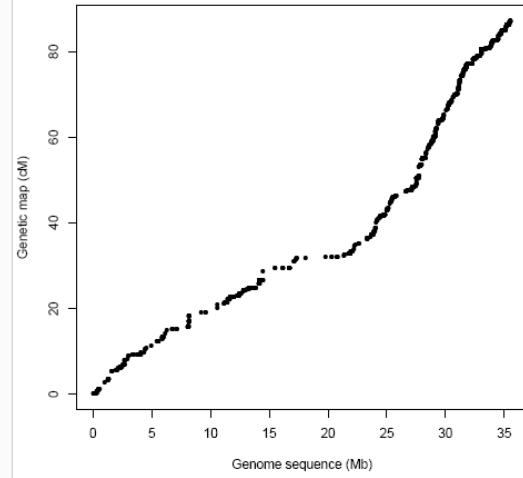

18

Chr19 PGA\_scaffold5\_62\_contigs\_length\_24390762

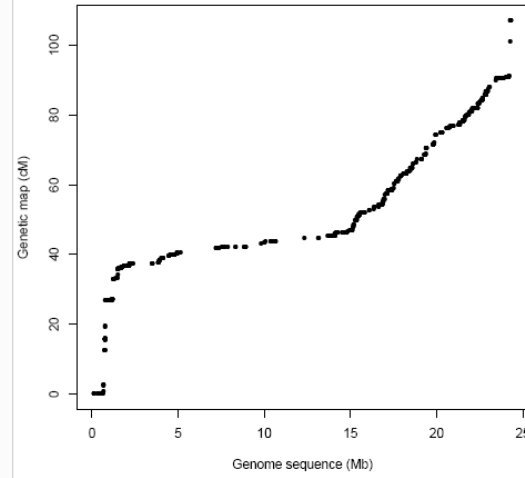

19

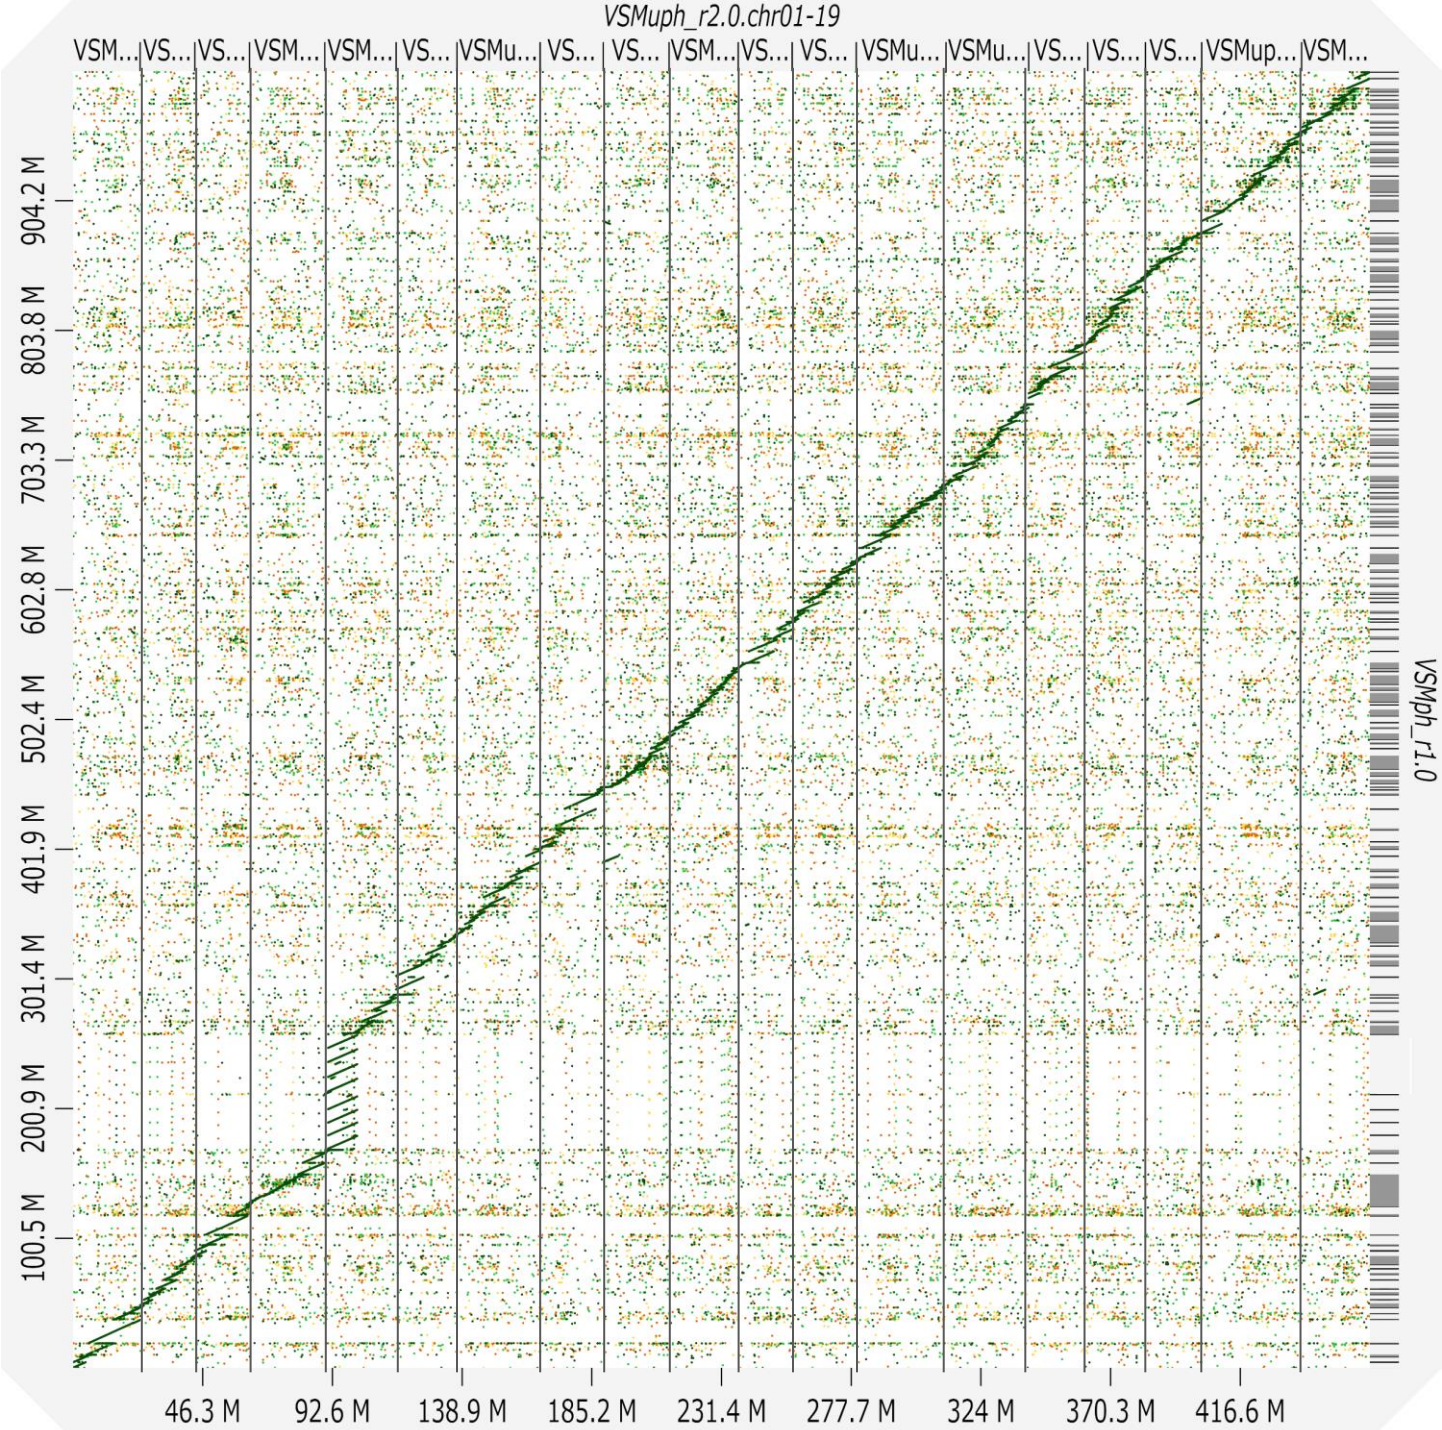

**Supplementary Fig. S4.** The genome sequences comparisons between the 19 pseudomolecules in VSMuph\_r2.0 (unphased) and VSMph\_r1.0 (phased) sequences.

A)

Akitsu 21  
*V. labruscana* × *V. vinifera*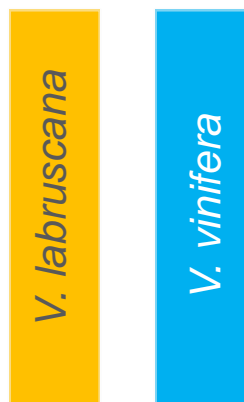'Hakunan'  
*V. vinifera*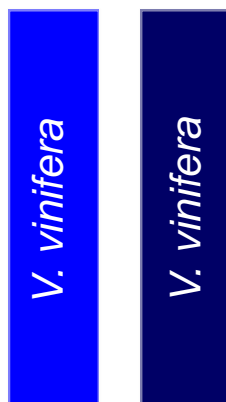

'Shine Muscat'

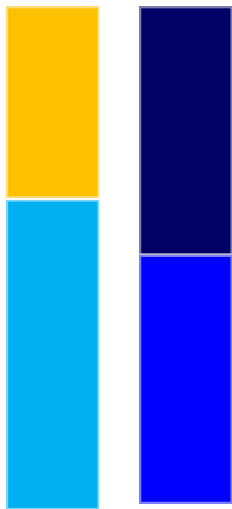

B)

Mapping  
Akitsu 21 reads**Expected allele type**Major: Hetero  
Minor: Ref homo  
Few: Alt homo\*Few Alt homo allele were identified because of sequence differences between *V. labruscana* and *V. vinifera*.Scaffold from  
Akitsu 21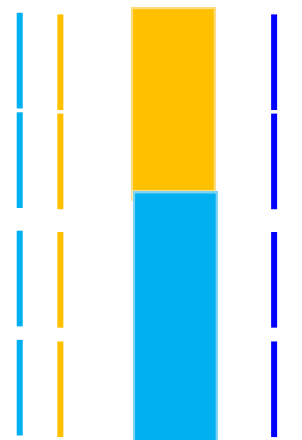Mapping  
'Hakunan' reads**Expected allele type**Major: Ref homo  
Minor: Hetero  
Few: Alt homoScaffold from  
'Hakunan'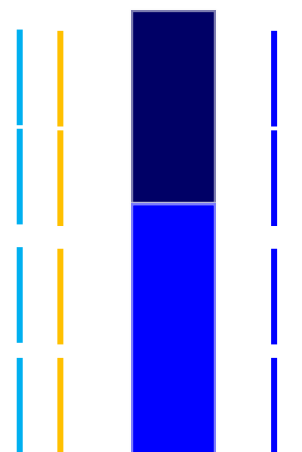**Expected allele type**Major: Alt homo  
Minor: Hetero  
Few: Ref homo**Expected allele type**Major: Ref homo  
Minor: Hetero  
Few: Alt homo

**Supplementary Fig. S5.** A schematic diagram of parental rads mapped onto the 'Shine Muscat' unphased genome and expected allele types on the variants. A) The haploid genome structure of the 'Shine Muscat' and the parental genomes. B) Expected allele types of Akitsu 21 and 'Hakunan' identified on the unphased 'Shine Muscat' genome sequences.



**Supplementary Fig. S6.** The genome sequences comparisons between the 19 pseudomolecules in VSMuph\_r2.0 and those in *V. vinifera*, *V. vinifera* subsp *sylvestrie* and *V. riparia*. Blue, green and black circles show genome regions observed possible deletion, duplication and inversion on VSMuph\_r2.0 against the compared sequences.

**A)** *V. vinifera* (12X) vs *V. labruscana* × *V. vinifera* (VSMuph\_r2.0)

**B)** *V. vinifera* subsp. *sylvestrie* (Sylvestris\_C1-2) vs *V. labruscana* × *V. vinifera* (VSMuph\_r2.0)

**C)** *V. riparia* (EGFV\_Vit.rip\_1.0) vs *V. labruscana* × *V. vinifera* (VSMuph\_r2.0)

A) *V. vinifera* (12X) vs *V. labruscana* × *V. vinifera* (VSMuph\_r2.0)

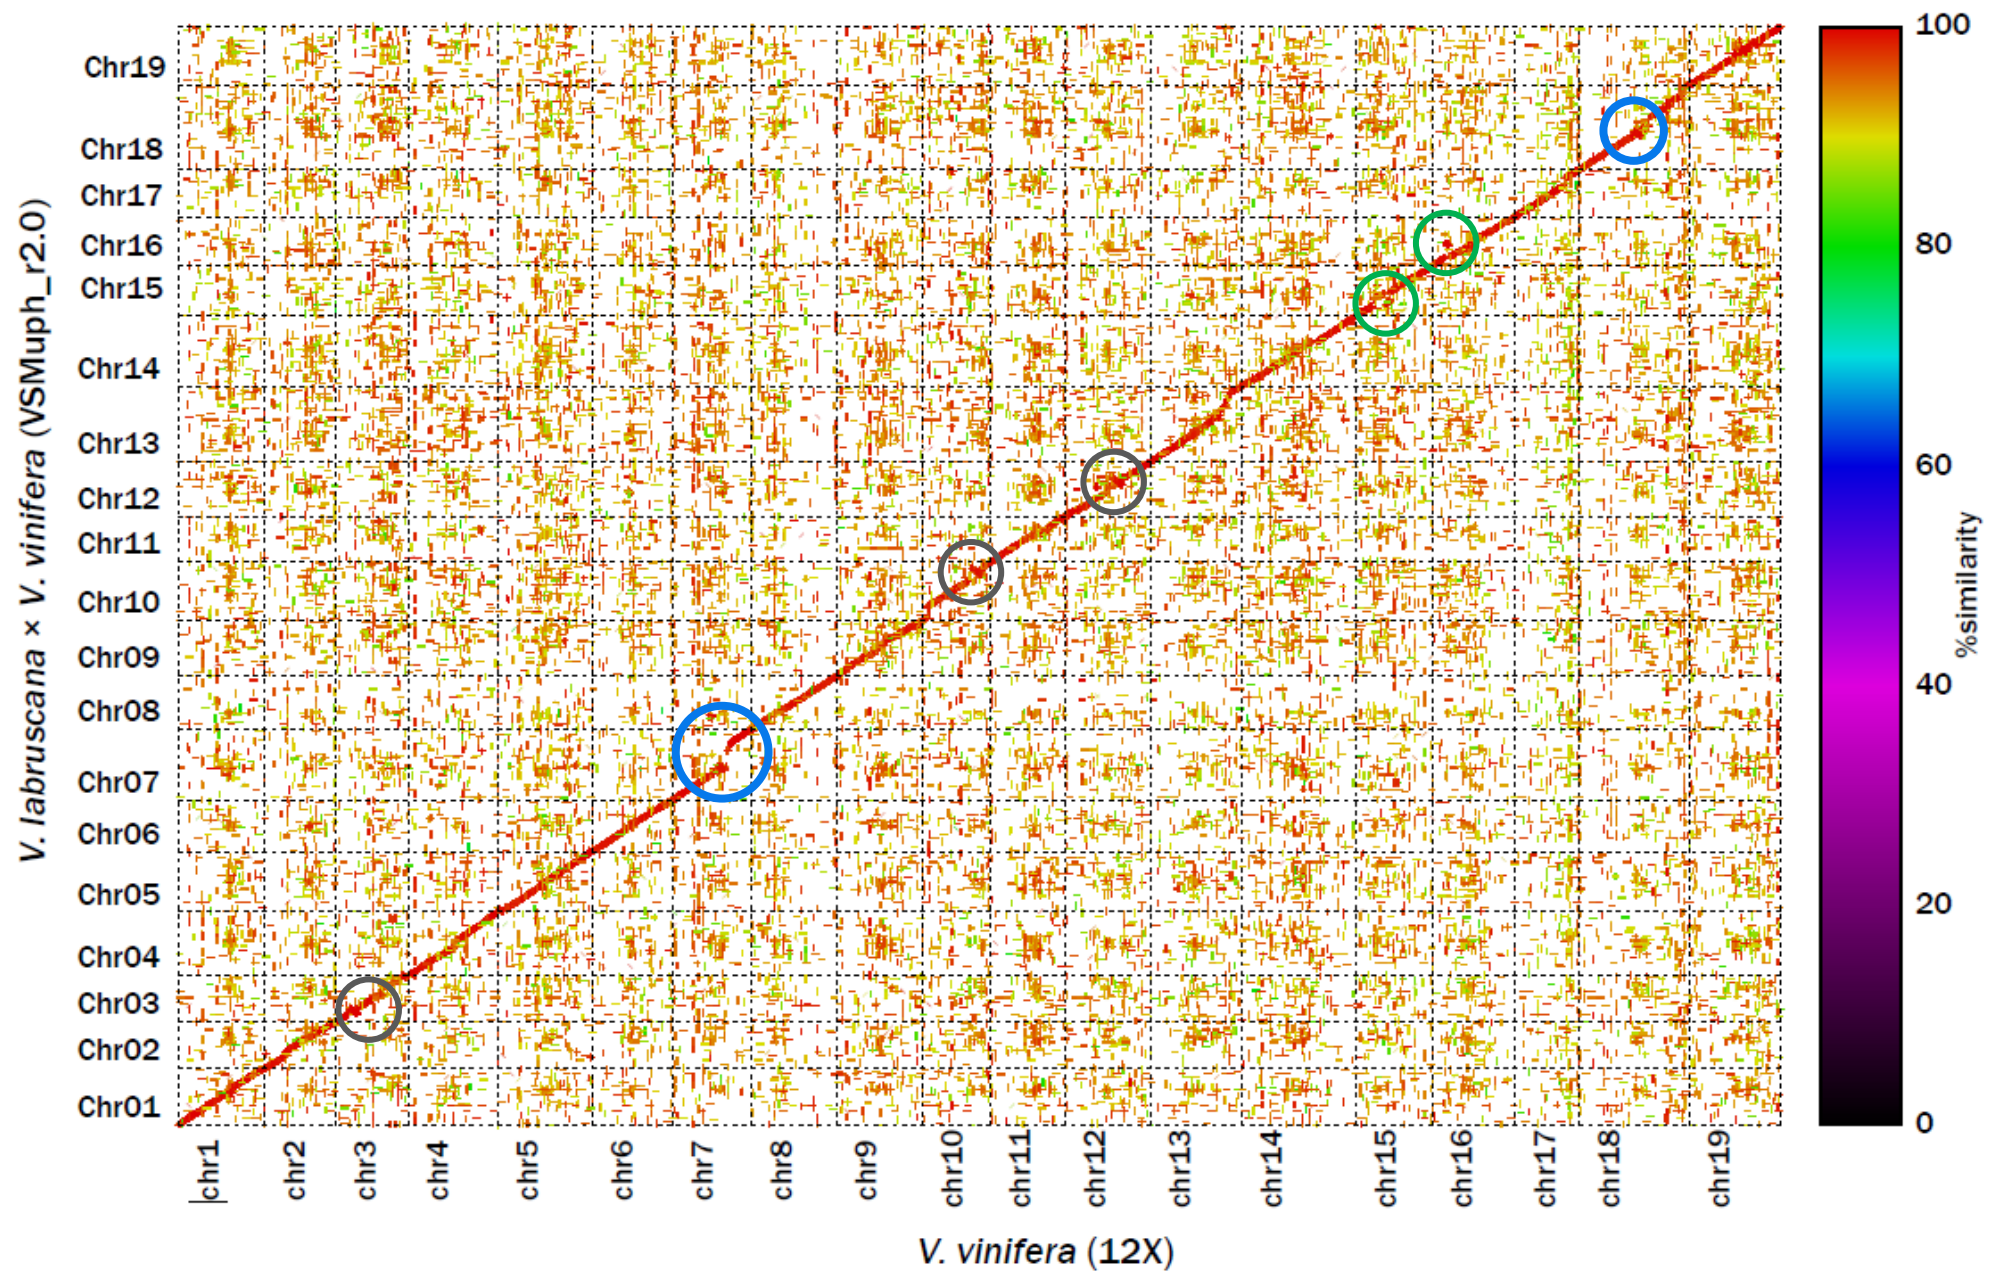

B) *V. vinifera* subsp. *sylvestrie* (Sylvestris\_C1-2) vs *V. labruscana* × *V. vinifera* (VSMuph\_r2.0)

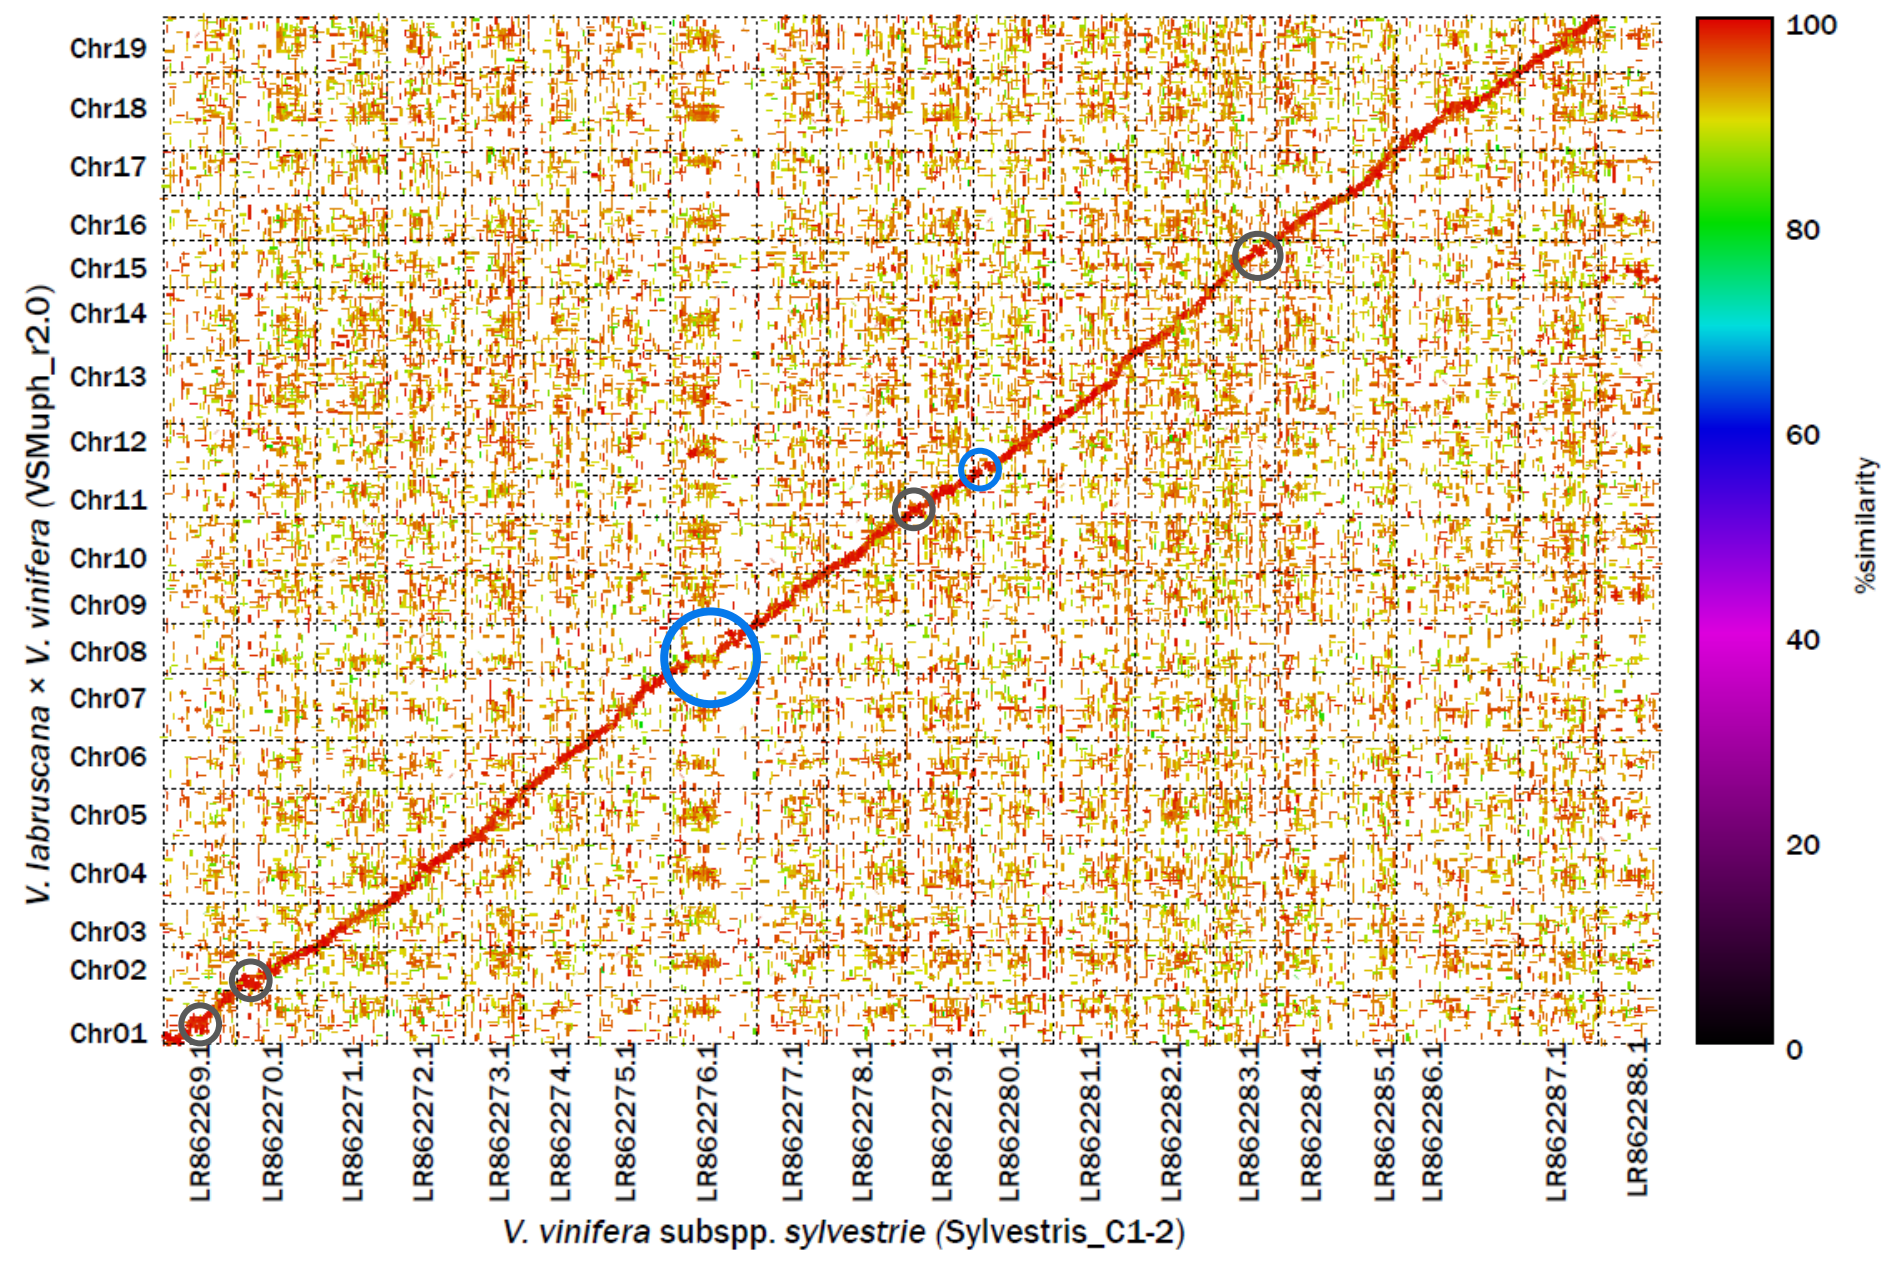



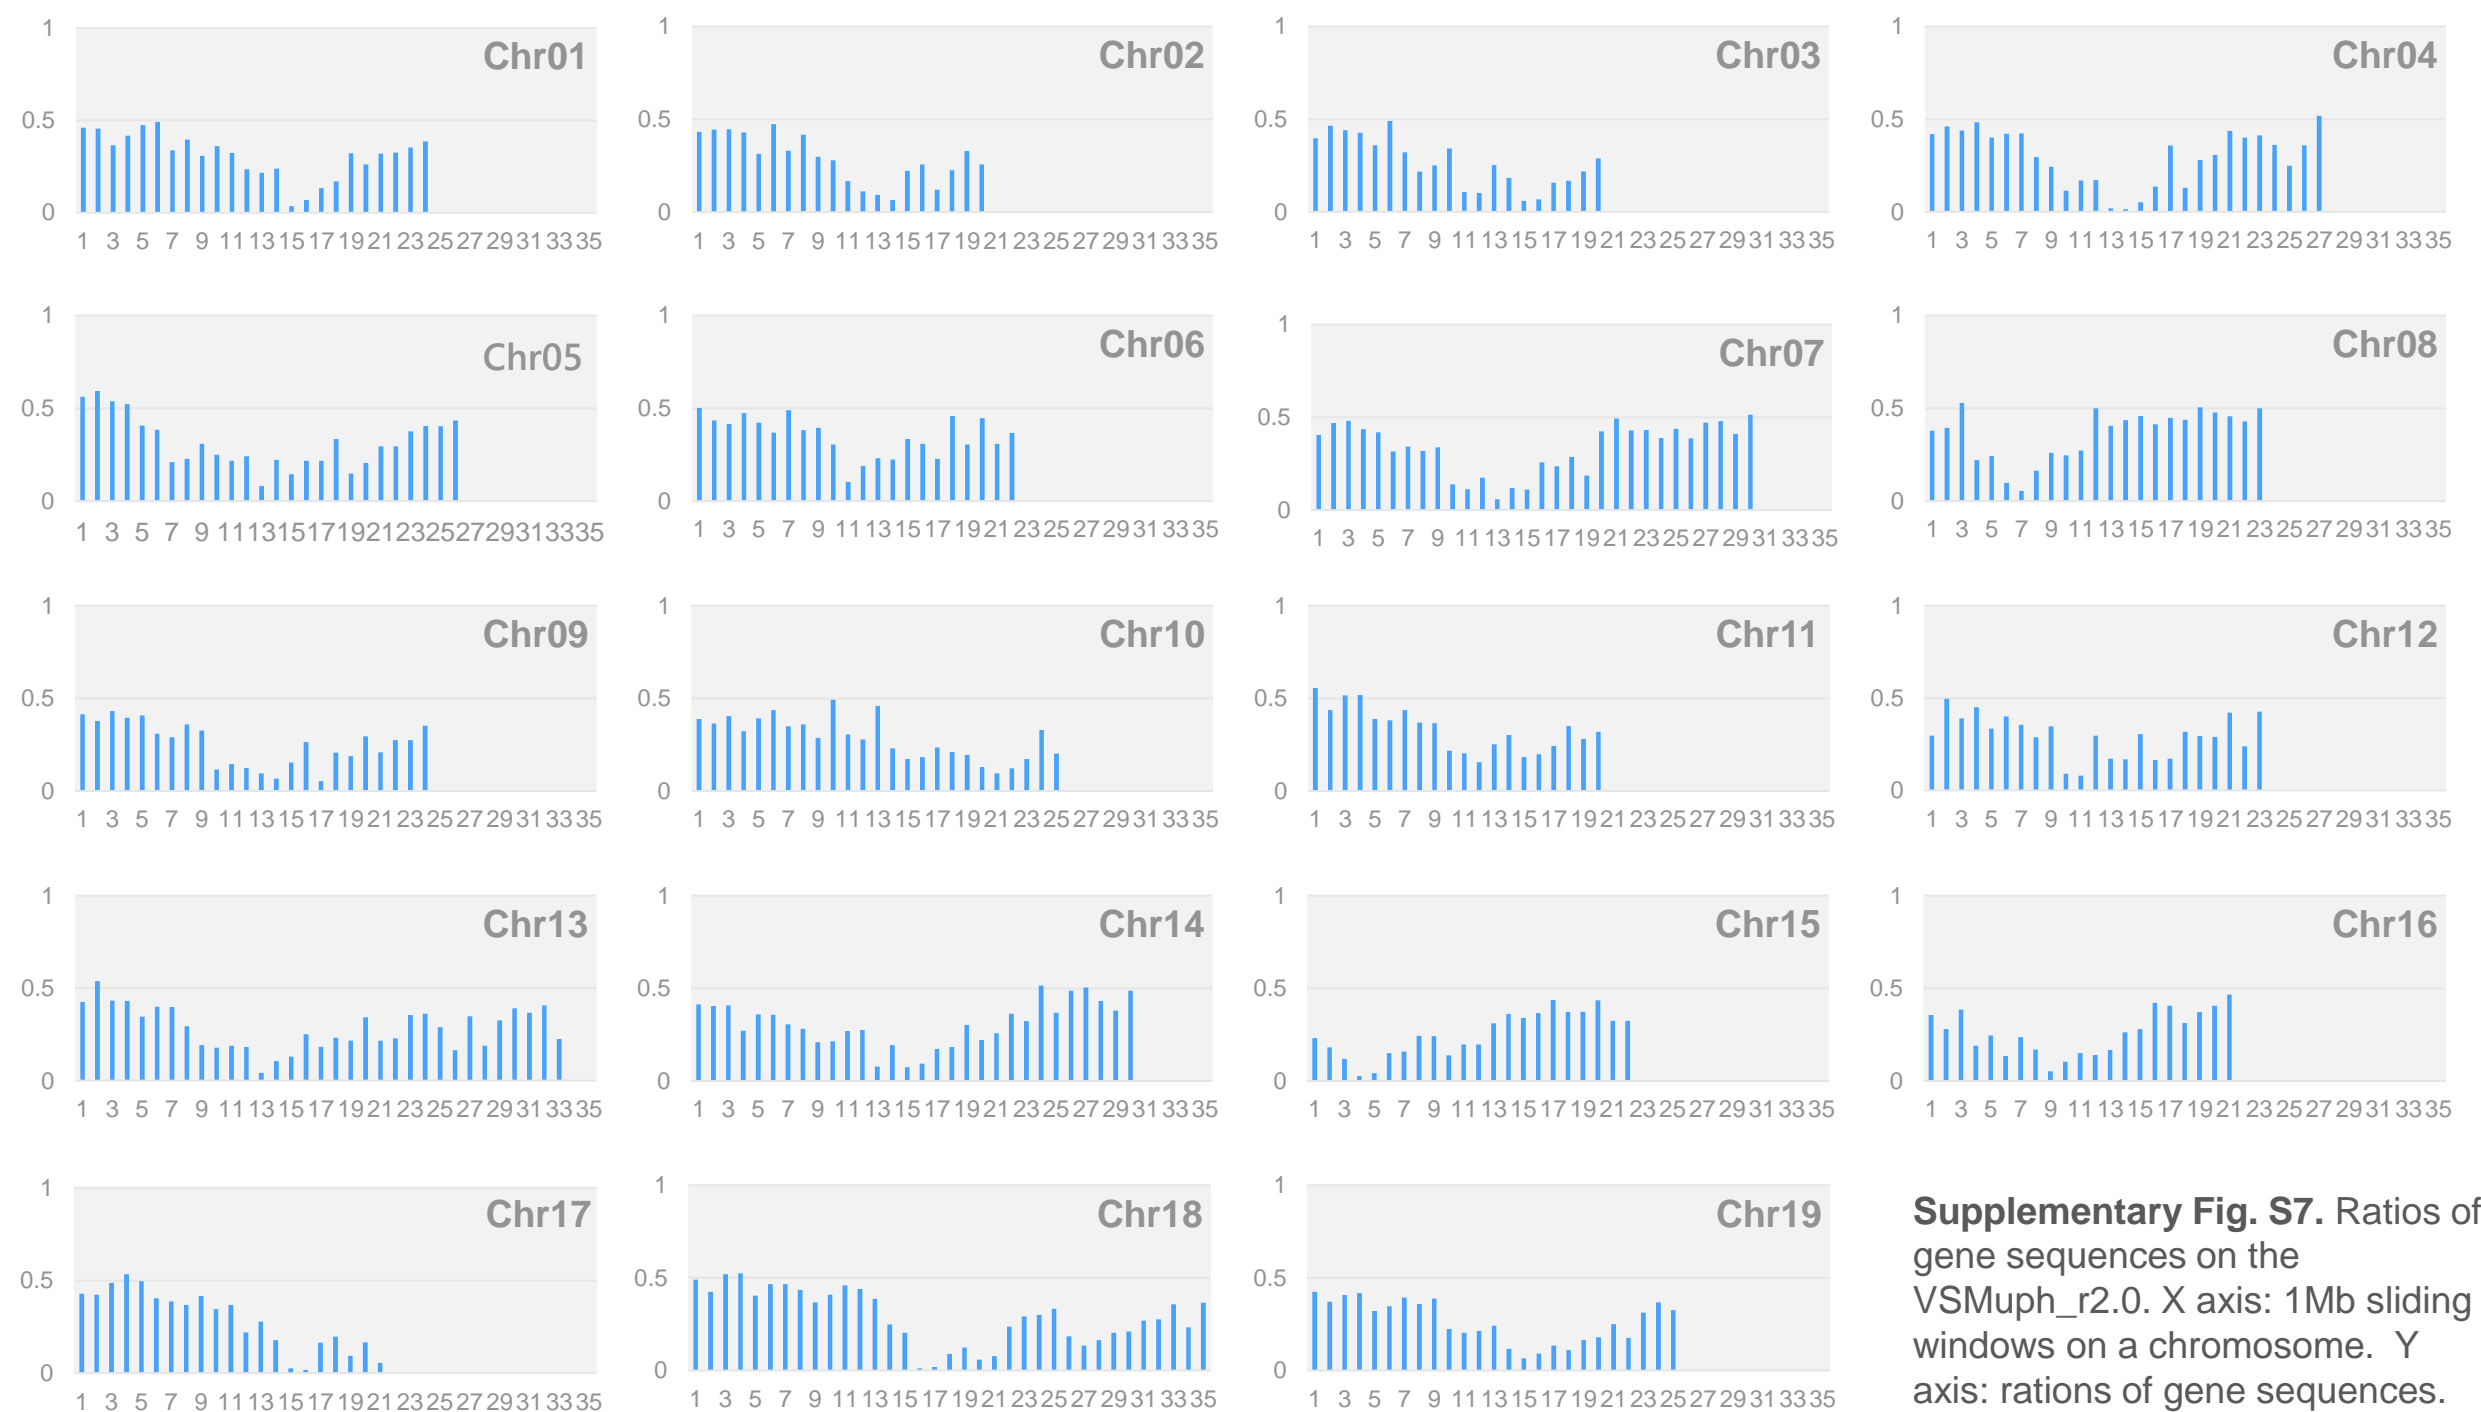

**Supplementary Fig. S7.** Ratios of gene sequences on the VSMuph\_r2.0. X axis: 1Mb sliding windows on a chromosome. Y axis: ratios of gene sequences.

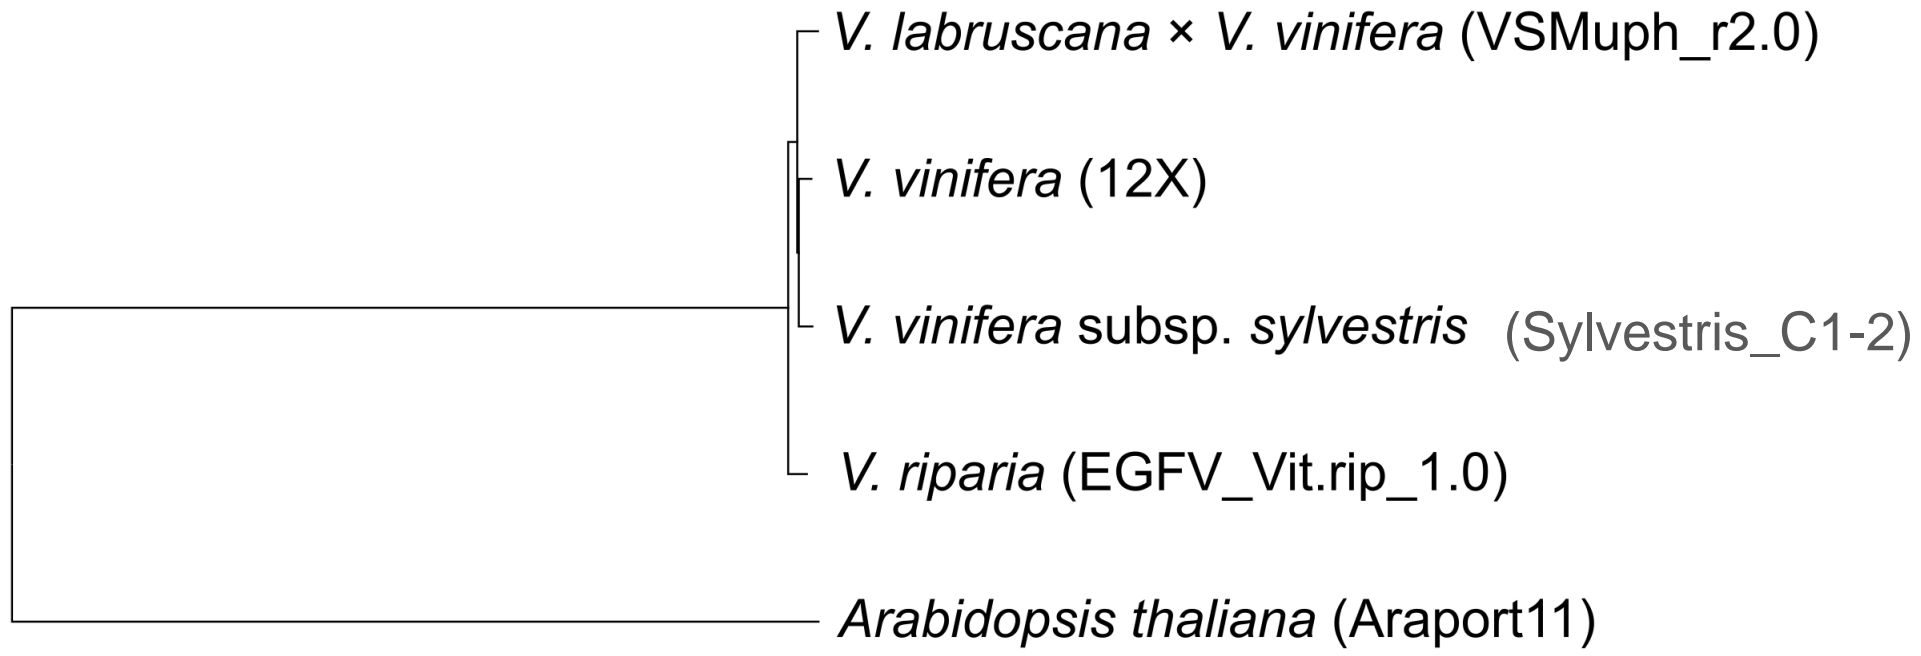

0.050

Supplementary Fig. S8. A phylogenetic tree of 956 common single copy genes of the four *Vitis* species *A. thaliana*.

**Supplementary Fig. S9.** Copy Number Variation of Akitsu 21 and 'Hakunan' against the unphased 'Shine Muscat' genome, VSMuph\_r2.0.

The  $\text{Log}_2$  ratio and p values was estimated by CNV-Seq software, based on mapped read count in each 1Mb sliding window.

# Chr01-Chr10

## Akitsu 21

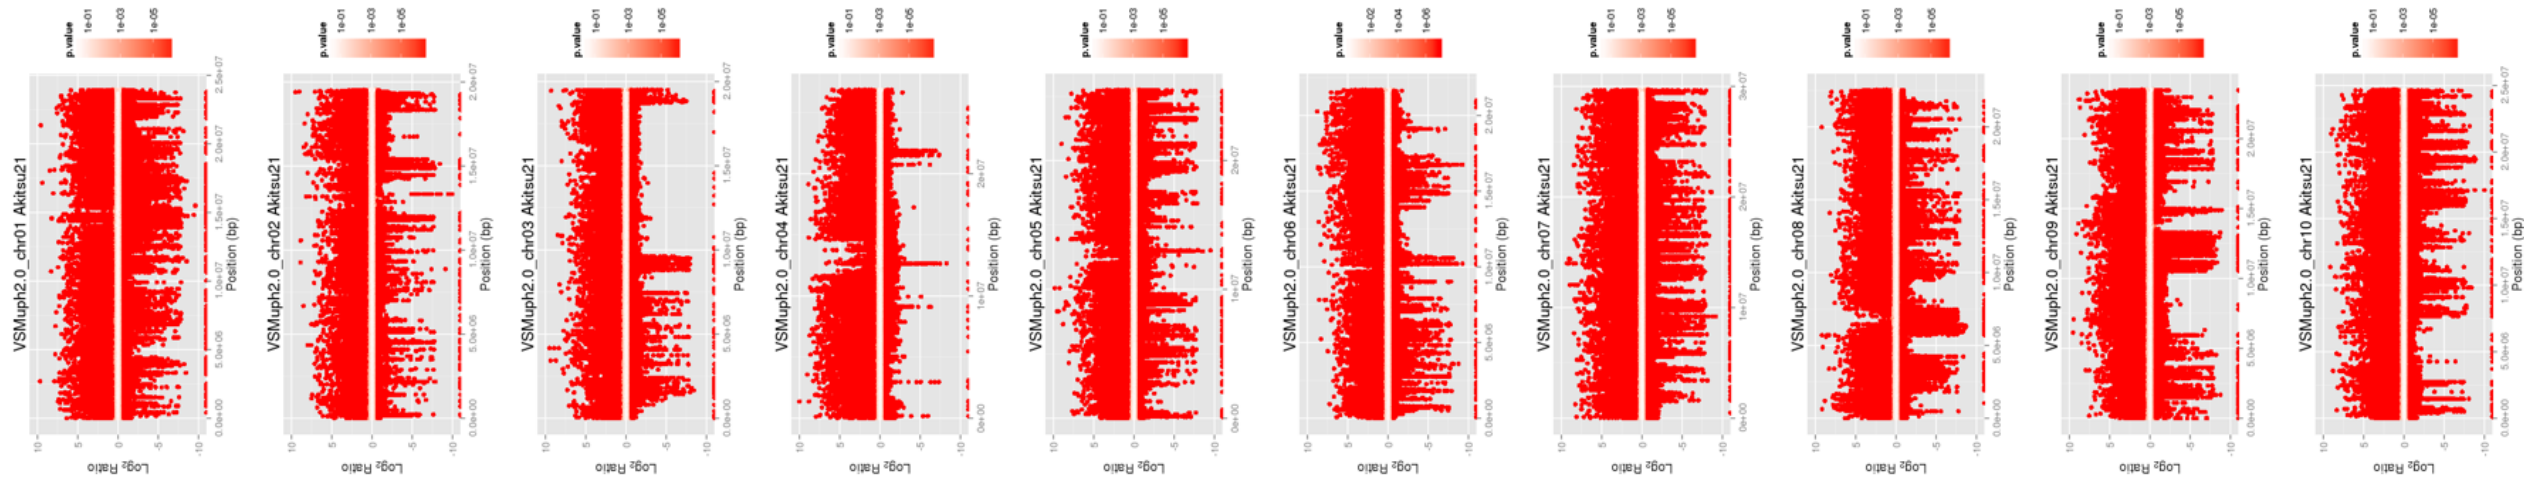

## Hakunan

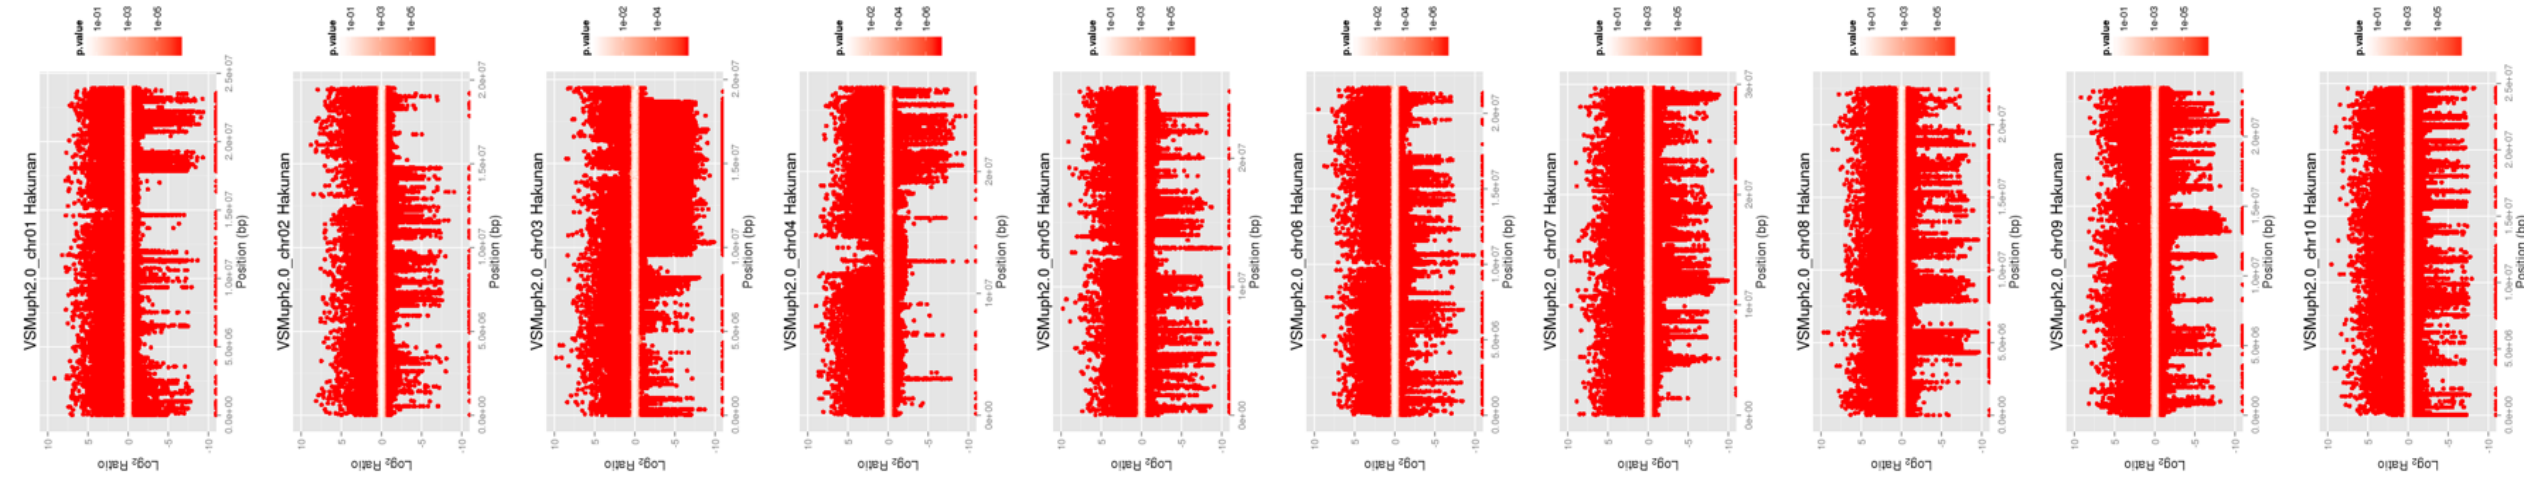



# Chr11-Chr19

## Akitsu 21

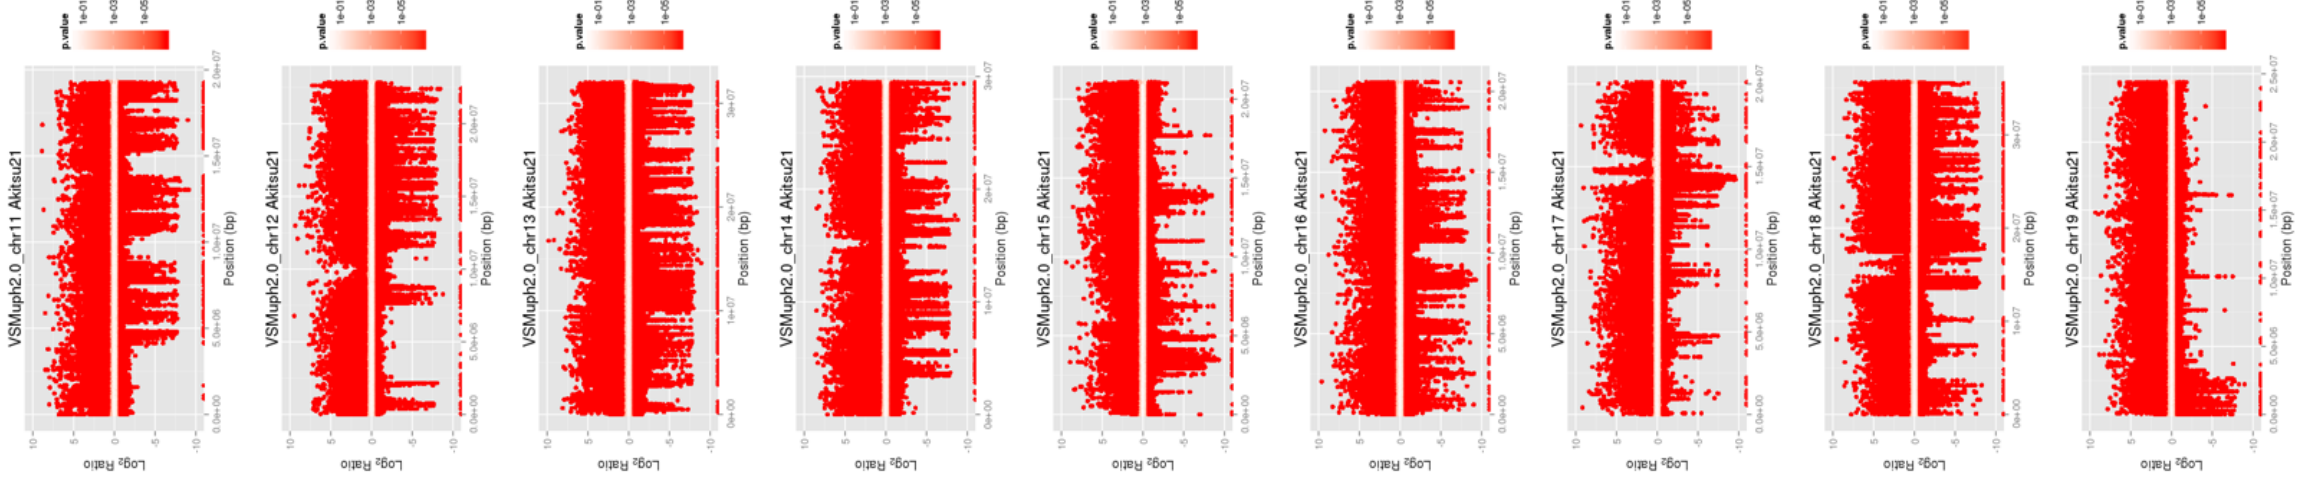

## Hakunan

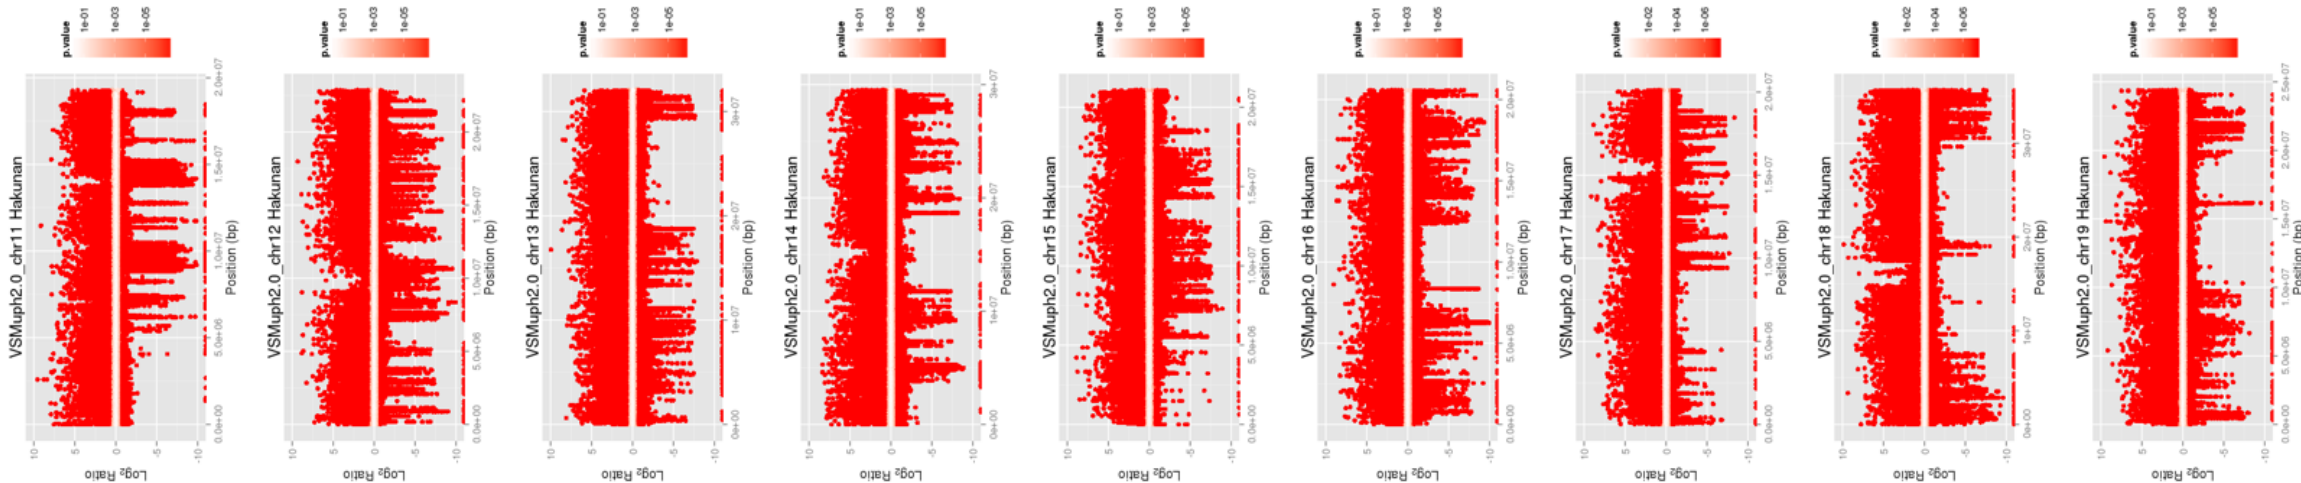

Supplement: dsac040_suppl_supplementary_figures.pdf [file dsac040_suppl_supplementary_figures.pdf]
